# Supplementary material for: Effectiveness and impact of networked communication interventions in young people with mental health conditions: A rapid review
Source: PubMed Central journal article supplement (PMC6005403; doi:10.1177/2055207618762209), 2018-03-21
Supplement: Appendix.pdf [file Appendix.pdf]

## Appendix

MEDLINE (Ovid) 1946 to August Week 3 2015, searched 27/08/2015

|    |                                                                                                                                                               |      |
|----|---------------------------------------------------------------------------------------------------------------------------------------------------------------|------|
| 1  | Electronic Mail/                                                                                                                                              | 2038 |
| 2  | (email* or e-mail* or web-mail* or webmail* or internet-mail*).tw.                                                                                            | 7666 |
| 3  | Text Messaging/                                                                                                                                               | 887  |
| 4  | (text messag* or texting or multimedia message*).tw.                                                                                                          | 1263 |
| 5  | ((mobile phone* or cellular phone* or cell phone*) and (message* or text* or sms or mms)).tw.                                                                 | 819  |
| 6  | Social Media/                                                                                                                                                 | 1923 |
| 7  | (social media or social networking or blog* or facebook or myspace or twitter).tw.                                                                            | 3505 |
| 8  | ((internet* or web* or information or patient or health) adj2 (portal* or forum)).tw.                                                                         | 1673 |
| 9  | (smartphone app* or smart phone app* or PDA app* or personal digital assistant app*).tw.                                                                      | 331  |
| 10 | (video-conferenc* or videoconferenc* or videophone* or video-phone* or Voice over Internet Protocol or VoIP or skype or (google adj2 (talk or hangouts))).tw. | 1810 |

|    |                                                                                                                                                                                                                                                                                                                                                                                                                                                                                                                                                                                                                                                                  |         |
|----|------------------------------------------------------------------------------------------------------------------------------------------------------------------------------------------------------------------------------------------------------------------------------------------------------------------------------------------------------------------------------------------------------------------------------------------------------------------------------------------------------------------------------------------------------------------------------------------------------------------------------------------------------------------|---------|
| 11 | Videoconferencing/                                                                                                                                                                                                                                                                                                                                                                                                                                                                                                                                                                                                                                               | 923     |
| 12 | digital interactive television.tw.                                                                                                                                                                                                                                                                                                                                                                                                                                                                                                                                                                                                                               | 5       |
| 13 | 1 or 2 or 3 or 4 or 5 or 6 or 7 or 8 or 9 or 10 or 11 or 12                                                                                                                                                                                                                                                                                                                                                                                                                                                                                                                                                                                                      | 17838   |
| 14 | (digital or electronic or virtual or computer* or software* or internet* or online or on-line or web* or multimedia or multi-media or communication technolog* or telecommunication* or ICT or network* technolog* or telemedic* or telecare or telehealth* or telepsychiatr*).ti.                                                                                                                                                                                                                                                                                                                                                                               | 163183  |
| 15 | *computer communication networks/ or *internet/                                                                                                                                                                                                                                                                                                                                                                                                                                                                                                                                                                                                                  | 37023   |
| 16 | *telecommunications/ or *telemedicine/ or *remote consultation/ or *telepathology/ or *teleradiology/ or *cell phones/ or *modems/ or *wireless technology/                                                                                                                                                                                                                                                                                                                                                                                                                                                                                                      | 22303   |
| 17 | 13 or 14 or 15 or 16                                                                                                                                                                                                                                                                                                                                                                                                                                                                                                                                                                                                                                             | 200778  |
| 18 | exp *Professional-Patient Relations/ or exp *Professional-Family Relations/                                                                                                                                                                                                                                                                                                                                                                                                                                                                                                                                                                                      | 62797   |
| 19 | ((clinic* or center* or centre* or service* or hospital* or doctor* or physician* or clinician* or nurse* or pharmacist* or health worker* or professional* or provider* or practitioner* or therapist* or educator* or psychiatr* or patient* or outpatient* or out-patient* or inpatient* or in-patient* or client* or child* or teen* or paediatric* or pediatric* or boy* or girl* or youth* or schoolchild* or adoles* or minor or minors or under age* or juvenile* or schoolage* or school age* or young adult* or young person* or young people or student* or parent* or mother* or father* or brother* or sister* or sibling* or family or families or | 2616393 |

|    |                                                                                                                                                                                                                                                                                                                                                                                                                                                               |         |
|----|---------------------------------------------------------------------------------------------------------------------------------------------------------------------------------------------------------------------------------------------------------------------------------------------------------------------------------------------------------------------------------------------------------------------------------------------------------------|---------|
|    | carer* or caregiver* or care giver*) adj4 (communicat* or relation* or interact* or convers* or discuss* or message* or feedback or respond* or response* or receive* or consult* or contact* or advice or advis* or counsel* or recommend* or monitor* or review* or diary or diaries or assess* or support* or educat* or train* or manage* or care or treat* or therapy or therapies or intervention* or report* or ongoing partnership)).tw.              |         |
| 20 | 18 or 19                                                                                                                                                                                                                                                                                                                                                                                                                                                      | 2652071 |
| 21 | 17 and 20                                                                                                                                                                                                                                                                                                                                                                                                                                                     | 41890   |
| 22 | Young Adult/ or Adolescent/ or Child/ or Students/                                                                                                                                                                                                                                                                                                                                                                                                            | 2569792 |
| 23 | (child* or teen* or paediatric* or pediatric* or boy* or girl* or youth* or schoolchild* or school child* or kid* or adoles* or minor or minors or under age* or juvenile* or pubescen* or secondary school* or highschool* or high school* or peer group* or schoolage* or school age* or young adult* or young person* or young people or student* or sixth form* or higher education or further education or undergraduate* or college* or universit*).tw. | 2217902 |
| 24 | 22 or 23                                                                                                                                                                                                                                                                                                                                                                                                                                                      | 3751056 |
| 25 | 21 and 24                                                                                                                                                                                                                                                                                                                                                                                                                                                     | 15042   |

MEDLINE In-Process & Other Non-Indexed Citations (Ovid) September 02, 2015, searched 03/09/2015

|   |                  |   |
|---|------------------|---|
| 1 | Electronic Mail/ | 0 |
|---|------------------|---|

|    |                                                                                                                                                                |       |
|----|----------------------------------------------------------------------------------------------------------------------------------------------------------------|-------|
| 2  | (email* or e-mail* or web-mail* or webmail* or internet-mail*).tw.                                                                                             | 1509  |
| 3  | Text Messaging/                                                                                                                                                | 0     |
| 4  | (text messag* or texting or multimedia message*).tw.                                                                                                           | 457   |
| 5  | ((mobile phone* or cellular phone* or cell phone*) and (message* or text* or sms or mms)).tw.                                                                  | 257   |
| 6  | Social Media/                                                                                                                                                  | 0     |
| 7  | (social media or social networking or blog* or facebook or myspace or twitter).tw.                                                                             | 1327  |
| 8  | ((internet* or web* or information or patient or health) adj2 (portal* or forum)).tw.                                                                          | 306   |
| 9  | (smartphone app* or smart phone app* or PDA app* or personal digital assistant app*).tw.                                                                       | 222   |
| 10 | (video-conferenc* or videoconferenc* or videophone* or video-phone* or Voice over Internet Protocol or VoIP or skype or (google adj2 (talk or hangouts))).tw.  | 240   |
| 11 | Videoconferencing/                                                                                                                                             | 0     |
| 12 | digital interactive television.tw.                                                                                                                             | 1     |
| 13 | 2 or 4 or 5 or 7 or 8 or 9 or 10 or 12                                                                                                                         | 3888  |
| 14 | (digital or electronic or virtual or computer* or software* or internet* or online or on-line or web* or multimedia or multi-media or communication technolog* | 27501 |

|    |                                                                                                                                                                                                                                                                                                                                                                                                                                                                                                                                                                                                                                                                                                                                                                                                                                                                                                                                                                                                                                                                                                                   |        |
|----|-------------------------------------------------------------------------------------------------------------------------------------------------------------------------------------------------------------------------------------------------------------------------------------------------------------------------------------------------------------------------------------------------------------------------------------------------------------------------------------------------------------------------------------------------------------------------------------------------------------------------------------------------------------------------------------------------------------------------------------------------------------------------------------------------------------------------------------------------------------------------------------------------------------------------------------------------------------------------------------------------------------------------------------------------------------------------------------------------------------------|--------|
|    | or telecommunication* or ICT or network* technolog* or telemedic* or telecare or telehealth* or telepsychiatr*).ti.                                                                                                                                                                                                                                                                                                                                                                                                                                                                                                                                                                                                                                                                                                                                                                                                                                                                                                                                                                                               |        |
| 15 | 13 or 14                                                                                                                                                                                                                                                                                                                                                                                                                                                                                                                                                                                                                                                                                                                                                                                                                                                                                                                                                                                                                                                                                                          | 30742  |
| 16 | ((clinic* or center* or centre* or service* or hospital* or doctor* or physician* or clinician* or nurse* or pharmacist* or health worker* or professional* or provider* or practitioner* or therapist* or educator* or psychiatr* or patient* or outpatient* or out-patient* or inpatient* or in-patient* or client* or child* or teen* or paediatric* or pediatric* or boy* or girl* or youth* or schoolchild* or adoles* or minor or minors or under age* or juvenile* or schoolage* or school age* or young adult* or young person* or young people or student* or parent* or mother* or father* or brother* or sister* or sibling* or family or families or carer* or caregiver* or care giver*) adj4 (communicat* or relation* or interact* or convers* or discuss* or message* or feedback or respond* or response* or receive* or consult* or contact* or advice or advis* or counsel* or recommend* or monitor* or review* or diary or diaries or assess* or support* or educat* or train* or manage* or care or treat* or therapy or therapies or intervention* or report* or ongoing partnership)).tw. | 252369 |
| 17 | 15 and 16                                                                                                                                                                                                                                                                                                                                                                                                                                                                                                                                                                                                                                                                                                                                                                                                                                                                                                                                                                                                                                                                                                         | 5700   |
| 18 | (child* or teen* or paediatric* or pediatric* or boy* or girl* or youth* or schoolchild* or school child* or kid* or adoles* or minor or minors or under age* or juvenile* or pubescen* or secondary school* or highschool* or high school* or peer group* or schoolage* or school age* or young adult* or young                                                                                                                                                                                                                                                                                                                                                                                                                                                                                                                                                                                                                                                                                                                                                                                                  | 191893 |

|    |                                                                                                                                              |      |
|----|----------------------------------------------------------------------------------------------------------------------------------------------|------|
|    | person* or young people or student* or sixth form* or higher education or further education or undergraduate* or college* or universit*).tw. |      |
| 19 | 17 and 18                                                                                                                                    | 1938 |

Embase (Ovid) 1974 to 2015 Week 35, searched 02/09/2015

|   |                                                                                               |       |
|---|-----------------------------------------------------------------------------------------------|-------|
| 1 | *e-mail/                                                                                      | 1150  |
| 2 | (email* or e-mail* or web-mail* or webmail* or internet-mail*).tw.                            | 18033 |
| 3 | *text messaging/                                                                              | 780   |
| 4 | (text messag* or texting or multimedia message*).tw.                                          | 2242  |
| 5 | ((mobile phone* or cellular phone* or cell phone*) and (message* or text* or sms or mms)).tw. | 1469  |
| 6 | *social media/                                                                                | 2002  |
| 7 | (social media or social networking or blog* or facebook or myspace or twitter).tw.            | 6596  |
| 8 | ((internet* or web* or information or patient or health) adj2 (portal* or forum)).tw.         | 2702  |
| 9 | (smartphone app* or smart phone app* or PDA app* or personal digital assistant app*).tw.      | 866   |

|    |                                                                                                                                                                                                                                                                                                                                                                                                                                                                                                                                                                                |         |
|----|--------------------------------------------------------------------------------------------------------------------------------------------------------------------------------------------------------------------------------------------------------------------------------------------------------------------------------------------------------------------------------------------------------------------------------------------------------------------------------------------------------------------------------------------------------------------------------|---------|
| 10 | (video-conferenc* or videoconferenc* or videophone* or video-phone* or Voice over Internet Protocol or VoIP or skype or (google adj2 (talk or hangouts))).tw.                                                                                                                                                                                                                                                                                                                                                                                                                  | 2742    |
| 11 | *videoconferencing/                                                                                                                                                                                                                                                                                                                                                                                                                                                                                                                                                            | 576     |
| 12 | digital interactive television.tw.                                                                                                                                                                                                                                                                                                                                                                                                                                                                                                                                             | 7       |
| 13 | 1 or 2 or 3 or 4 or 5 or 6 or 7 or 8 or 9 or 10 or 11 or 12                                                                                                                                                                                                                                                                                                                                                                                                                                                                                                                    | 33230   |
| 14 | (digital or electronic or virtual or computer* or software* or internet* or online or on-line or web* or multimedia or multi-media or communication technolog* or telecommunication* or ICT or network* technolog* or telemedic* or telecare or telehealth* or telepsychiatr*).ti.                                                                                                                                                                                                                                                                                             | 219504  |
| 15 | *computer network/ or *internet/                                                                                                                                                                                                                                                                                                                                                                                                                                                                                                                                               | 34588   |
| 16 | exp *telehealth/ or *teleconsultation/ or *mobile phone/                                                                                                                                                                                                                                                                                                                                                                                                                                                                                                                       | 18931   |
| 17 | 13 or 14 or 15 or 16                                                                                                                                                                                                                                                                                                                                                                                                                                                                                                                                                           | 267290  |
| 18 | *doctor patient relation/ or *nurse patient relationship/                                                                                                                                                                                                                                                                                                                                                                                                                                                                                                                      | 47263   |
| 19 | ((clinic* or center* or centre* or service* or hospital* or doctor* or physician* or clinician* or nurse* or pharmacist* or health worker* or professional* or provider* or practitioner* or therapist* or educator* or psychiatr* or patient* or outpatient* or out-patient* or inpatient* or in-patient* or client* or child* or teen* or paediatric* or pediatric* or boy* or girl* or youth* or schoolchild* or adoles* or minor or minors or under age* or juvenile* or schoolage* or school age* or young adult* or young person* or young people or student* or parent* | 3905370 |

|    |                                                                                                                                                                                                                                                                                                                                                                                                                                                                                                                                    |         |
|----|------------------------------------------------------------------------------------------------------------------------------------------------------------------------------------------------------------------------------------------------------------------------------------------------------------------------------------------------------------------------------------------------------------------------------------------------------------------------------------------------------------------------------------|---------|
|    | or mother* or father* or brother* or sister* or sibling* or family or families or carer* or caregiver* or care giver*) adj4 (communicat* or relation* or interact* or convers* or discuss* or message* or feedback or respond* or response* or receive* or consult* or contact* or advice or advis* or counsel* or recommend* or monitor* or review* or diary or diaries or assess* or support* or educat* or train* or manage* or care or treat* or therapy or therapies or intervention* or report* or ongoing partnership)).tw. |         |
| 20 | 18 or 19                                                                                                                                                                                                                                                                                                                                                                                                                                                                                                                           | 3933505 |
| 21 | 17 and 20                                                                                                                                                                                                                                                                                                                                                                                                                                                                                                                          | 63407   |
| 22 | exp student/                                                                                                                                                                                                                                                                                                                                                                                                                                                                                                                       | 91612   |
| 23 | (child* or teen* or paediatric* or pediatric* or boy* or girl* or youth* or schoolchild* or school child* or kid* or adoles* or minor or minors or under age* or juvenile* or pubescen* or secondary school* or highschool* or high school* or peer group* or schoolage* or school age* or young adult* or young person* or young people or student* or sixth form* or higher education or further education or undergraduate* or college* or universit*).tw.                                                                      | 3188530 |
| 24 | limit 21 to (child <unspecified age> or school child <7 to 12 years> or adolescent <13 to 17 years>)                                                                                                                                                                                                                                                                                                                                                                                                                               | 8020    |
| 25 | 22 or 23                                                                                                                                                                                                                                                                                                                                                                                                                                                                                                                           | 3205416 |
| 26 | 21 and 25                                                                                                                                                                                                                                                                                                                                                                                                                                                                                                                          | 20498   |
| 27 | 24 or 26                                                                                                                                                                                                                                                                                                                                                                                                                                                                                                                           | 22140   |



|     |                                                                                                                                                                                                     |       |
|-----|-----------------------------------------------------------------------------------------------------------------------------------------------------------------------------------------------------|-------|
| #1  | MeSH descriptor: [Electronic Mail] this term only                                                                                                                                                   | 208   |
| #2  | (email* or e-mail* or webmail* or web-mail* or internet-mail*):ti,ab,kw                                                                                                                             | 1042  |
| #3  | MeSH descriptor: [Text Messaging] this term only                                                                                                                                                    | 161   |
| #4  | (text next messag* or texting or multimedia next message*):ti,ab,kw                                                                                                                                 | 529   |
| #5  | ((mobile next phone* or cellular next phone* or cell next phone*) and (message* or text* or sms or mms)):ti,ab,kw                                                                                   | 334   |
| #6  | MeSH descriptor: [Social Media] this term only                                                                                                                                                      | 26    |
| #7  | ("social media" or "social networking" or blog* or facebook or myspace or twitter):ti,ab,kw                                                                                                         | 190   |
| #8  | ((internet* or web* or information or patient or health) near/2 (portal* or forum)):ti,ab,kw                                                                                                        | 110   |
| #9  | (smartphone next app* or "smart phone" next app* or PDA next app* or "personal digital assistant" next app*):ti,ab,kw                                                                               | 69    |
| #10 | (video-conferenc* or videoconferenc* or videophone* or video-phone* or "Voice over Internet Protocol" or VoIP or skype or (google near/2 (talk or hangouts))):ti,ab,kw                              | 318   |
| #11 | MeSH descriptor: [Videoconferencing] this term only                                                                                                                                                 | 98    |
| #12 | "digital interactive television":ti,ab,kw                                                                                                                                                           | 1     |
| #13 | #1 or #2 or #3 or #4 or #5 or #6 or #7 or #8 or #9 or #10 or #11 or #12                                                                                                                             | 2260  |
| #14 | (digital or electronic or virtual or computer* or software* or internet* or online or on-line or web* or multimedia or multi-media or communication next technolog* or telecommunication* or ICT or | 10980 |

|     |                                                                                                                                                                                                                                                                                                                                                                                                                                                                                                                                                                                                                                                                                                                                                                                                                                                                                                                                                                                                                                                                   |        |
|-----|-------------------------------------------------------------------------------------------------------------------------------------------------------------------------------------------------------------------------------------------------------------------------------------------------------------------------------------------------------------------------------------------------------------------------------------------------------------------------------------------------------------------------------------------------------------------------------------------------------------------------------------------------------------------------------------------------------------------------------------------------------------------------------------------------------------------------------------------------------------------------------------------------------------------------------------------------------------------------------------------------------------------------------------------------------------------|--------|
|     | network* next technolog* or telemedic* or telecare or telehealth* or telepsychiatr*):ti                                                                                                                                                                                                                                                                                                                                                                                                                                                                                                                                                                                                                                                                                                                                                                                                                                                                                                                                                                           |        |
| #15 | [mh ^"computer communication networks" [mj]] or [mh ^internet [mj]]                                                                                                                                                                                                                                                                                                                                                                                                                                                                                                                                                                                                                                                                                                                                                                                                                                                                                                                                                                                               | 1045   |
| #16 | [mh ^telecommunications [mj]] or [mh ^telemedicine [mj]] or [mh ^"remote consultation" [mj]] or [mh ^telepathology [mj]] or [mh ^teleradiology [mj]] or [mh ^"cell phones" [mj]] or [mh ^modems [mj]] or [mh ^"wireless technology" [mj]]                                                                                                                                                                                                                                                                                                                                                                                                                                                                                                                                                                                                                                                                                                                                                                                                                         | 528    |
| #17 | #13 or #14 or #15 or #16                                                                                                                                                                                                                                                                                                                                                                                                                                                                                                                                                                                                                                                                                                                                                                                                                                                                                                                                                                                                                                          | 12873  |
| #18 | [mh "Professional-Patient Relations" [mj]] or [mh "Professional-Family Relations" [mj]]                                                                                                                                                                                                                                                                                                                                                                                                                                                                                                                                                                                                                                                                                                                                                                                                                                                                                                                                                                           | 1808   |
| #19 | ((clinic* or center* or centre* or service* or hospital* or doctor* or physician* or clinician* or nurse* or pharmacist* or health next worker* or professional* or provider* or practitioner* or therapist* or educator* or psychiatrist* or patient* or outpatient* or out-patient* or inpatient* or in-patient* or client* or child* or teen* or paediatric* or pediatric* or boy* or girl* or youth* or schoolchild* or adoles* or minor or minors or under next age* or juvenile* or schoolage* or school next age* or young next adult* or young next person* or young next people or student* or parent* or mother* or father* or brother* or sister* or sibling* or family or families or carer* or caregiver* or care next giver*) near/4 (communicat* or relation* or interact* or convers* or discuss* or message* or feedback or respond* or response* or receive* or consult* or contact* or advice or advis* or counsel* or recommend* or monitor* or review* or diary or diaries or assess* or support* or educat* or train* or manage* or care or | 347291 |

|     |                                                                                                                                                                                                                                                                                                                                                                                                                                                                                                                                |        |
|-----|--------------------------------------------------------------------------------------------------------------------------------------------------------------------------------------------------------------------------------------------------------------------------------------------------------------------------------------------------------------------------------------------------------------------------------------------------------------------------------------------------------------------------------|--------|
|     | treat* or therapy or therapies or intervention* or report* or ongoing next partnership)):ti,ab,kw                                                                                                                                                                                                                                                                                                                                                                                                                              |        |
| #20 | #18 or #19                                                                                                                                                                                                                                                                                                                                                                                                                                                                                                                     | 347294 |
| #21 | #17 and #20                                                                                                                                                                                                                                                                                                                                                                                                                                                                                                                    | 6476   |
| #22 | [mh ^"Young Adult"] or [mh ^Adolescent] or [mh ^Child] or [mh ^Students]                                                                                                                                                                                                                                                                                                                                                                                                                                                       | 78701  |
| #23 | (child* or teen* or paediatric* or pediatric* or boy* or girl* or youth* or schoolchild* or school next child* or kid* or adoles* or minor or minors or under next age* or juvenile* or pubescen* or secondary next school* or highschool* or high next school* or peer next group* or schoolage* or school next age* or young next adult* or young next person* or young next people or student* or sixth next form* or higher next education or further next education or undergraduate* or college* or universit*):ti,ab,kw | 231913 |
| #24 | #22 or #23                                                                                                                                                                                                                                                                                                                                                                                                                                                                                                                     | 231913 |
| #25 | #21 and #24                                                                                                                                                                                                                                                                                                                                                                                                                                                                                                                    | 2781   |

All Results (2781)

Cochrane Reviews (39)

Other Reviews (61)

Trials (2588)

Methods Studies (67)

Technology Assessments (6)

Economic Evaluations (20)

Cochrane Groups (0)

PsycINFO (Proquest), searched 08/09/2015

n.b. Results exported from line 24. Line S24 Limited to 2009 onwards due to Proquest restrictions on the number of records that can be exported. Unable to export results from line S21.

|         |                                                                                                                                    |                |
|---------|------------------------------------------------------------------------------------------------------------------------------------|----------------|
| S2<br>4 | S17 AND S22<br><br>Limited by:<br><br>Publication date after 2009                                                                  | 2,957*         |
| S2<br>3 | S17 AND S22                                                                                                                        | 4,707*         |
| S2<br>2 | S18Limits applied                                                                                                                  | 188,824*       |
| S2<br>1 | S19 AND S20                                                                                                                        | 9,421*         |
| S2<br>0 | TL,AB(child* OR teen* OR paediatric* OR pediatric* OR boy* OR girl*<br>OR youth* OR schoolchild* OR school PRE/0 child* OR kid* OR | 1,245,671<br>* |

|         |                                                                                                                                                                                                                                                                                                                                                                                                                                                                                                                                                                                                                                                                                                                                                                                                                                                                                                                                                                                                                          |          |
|---------|--------------------------------------------------------------------------------------------------------------------------------------------------------------------------------------------------------------------------------------------------------------------------------------------------------------------------------------------------------------------------------------------------------------------------------------------------------------------------------------------------------------------------------------------------------------------------------------------------------------------------------------------------------------------------------------------------------------------------------------------------------------------------------------------------------------------------------------------------------------------------------------------------------------------------------------------------------------------------------------------------------------------------|----------|
|         | <p>adoles* OR minor OR minors OR under PRE/0 age* OR juvenile* OR pubescen* OR secondary PRE/0 school* OR highschool* OR high PRE/0 school* OR peer PRE/0 group* OR schoolage* OR school PRE/0 age* OR young PRE/0 adult* OR young PRE/0 person* OR young PRE/0 people OR student* OR sixth PRE/0 form* OR higher PRE/0 education OR further PRE/0 education OR undergraduate* OR college* OR universit*)</p>                                                                                                                                                                                                                                                                                                                                                                                                                                                                                                                                                                                                            |          |
| S1<br>9 | S17 AND S18                                                                                                                                                                                                                                                                                                                                                                                                                                                                                                                                                                                                                                                                                                                                                                                                                                                                                                                                                                                                              | 15,817*  |
| S1<br>8 | <p>TL,AB((clinic* OR center* OR centre* OR service* OR hospital* OR doctor* OR physician* OR clinician* OR nurse* OR pharmacist* OR health PRE/0 worker* OR professional* OR provider* OR practitioner* OR therapist* OR educator* OR psychiatr* OR patient* OR outpatient* OR out-patient* OR inpatient* OR in-patient* OR client* OR child* OR teen* OR paediatric* OR pediatric* OR boy* OR girl* OR youth* OR schoolchild* OR adoles* OR minor OR minors OR under PRE/0 age* OR juvenile* OR schoolage* OR school PRE/0 age* OR young PRE/0 adult* OR young PRE/0 person* OR young PRE/0 people OR student* OR parent* OR mother* OR father* OR brother* OR sister* OR sibling* OR family OR families OR carer* OR caregiver* OR care PRE/0 giver*)</p> <p>PRE/3 (communicat* OR relation* OR interact* OR convers* OR discuss* OR message* OR feedback OR respond* OR response* OR receive* OR consult* OR contact* OR advice OR advis* OR counsel* OR recommend* OR monitor* OR review* OR diary OR diaries OR</p> | 642,259* |

|         |                                                                                                                                                                                                                                                                                                                                                                                      |         |
|---------|--------------------------------------------------------------------------------------------------------------------------------------------------------------------------------------------------------------------------------------------------------------------------------------------------------------------------------------------------------------------------------------|---------|
|         | <p>           assess* OR support* OR educat* OR train* OR manage* OR care OR<br/>           treat* OR therapy OR therapies OR intervention* OR report* OR<br/>           ongoing PRE/0 partnership))         </p>                                                                                                                                                                    |         |
| S1<br>7 | S10 OR S11 OR S12 OR S13 OR S14 OR S15 OR S16                                                                                                                                                                                                                                                                                                                                        | 84,172* |
| S1<br>6 | MJSUB.EXACT("Online Therapy")                                                                                                                                                                                                                                                                                                                                                        | 1,492°  |
| S1<br>5 | MJSUB.EXACT("Telemedicine")                                                                                                                                                                                                                                                                                                                                                          | 2,614°  |
| S1<br>4 | MJSUB.EXACT("Internet")                                                                                                                                                                                                                                                                                                                                                              | 19,034* |
| S1<br>3 | MJSUB.EXACT("Cellular Phones")                                                                                                                                                                                                                                                                                                                                                       | 2,003°  |
| S1<br>2 | MJSUB.EXACT("Websites")                                                                                                                                                                                                                                                                                                                                                              | 2,602°  |
| S1<br>1 | <p>           TI(digital OR electronic OR virtual OR computer* OR software* OR<br/>           internet* OR online OR on-line OR web* OR multimedia OR multi-<br/>           media OR communication PRE/0 technolog* OR telecommunication*<br/>           OR ICT OR network* PRE/0 technolog* OR telemedic* OR telecare OR<br/>           telehealth* OR telepsychiatr*)         </p> | 63,637* |
| S1<br>0 | S1 OR S2 OR S3 OR S4 OR S5 OR S6 OR S7 OR S8 OR S9                                                                                                                                                                                                                                                                                                                                   | 22,147* |

|    |                                                                                                                                                                   |         |
|----|-------------------------------------------------------------------------------------------------------------------------------------------------------------------|---------|
| S9 | MJSUB.EXACT.EXPLODE("Electronic Communication")                                                                                                                   | 10,148* |
| S8 | TI,AB("digital interactive television")                                                                                                                           | 4°      |
| S7 | TI,AB(video-conferenc* OR videoconferenc* OR videophone* OR video-phone* OR "Voice over Internet Protocol" OR VoIP OR skype OR (google PRE/1 (talk OR hangouts))) | 1,466°  |
| S6 | TI,AB((smartphone PRE/1 app* OR "smart phone" PRE/1 app* OR PDA PRE/1 app* OR "personal digital assistant" PRE/1 app*))                                           | 169°    |
| S5 | TI,AB((internet* OR web* OR information OR patient OR health) NEAR/1 (portal* OR forum))                                                                          | 745°    |
| S4 | TI,AB("social media" OR "social networking" OR blog* OR facebook OR myspace OR twitter)                                                                           | 7,850*  |
| S3 | TI,AB((mobile PRE/0 phone* OR cellular PRE/0 phone* OR cell PRE/0 phone*) AND (message* OR text* OR sms OR mms))                                                  | 766°    |
| S2 | TI,AB(text PRE/0 messag* OR texting OR multimedia PRE/0 message*)                                                                                                 | 1,342°  |
| S1 | TI,AB(email* OR e-mail* OR web-mail* OR webmail* OR internet-mail*)                                                                                               | 6,408*  |

**Results of the above searches were exported to an EndNote Library and de-duplicated. Records were then sorted by year of publication in EndNote and any with 2009 and later or blank in the 'Year' field were moved into a group. The following search terms were then applied within this group**

| <b>Term</b>                              | <b>Any<br/>Field</b> | <b>Title<br/>Field</b> |
|------------------------------------------|----------------------|------------------------|
| <b>General mental health</b>             |                      |                        |
| mental*                                  |                      | 401                    |
| psych*                                   |                      | 576                    |
| disorder*                                |                      | 418                    |
| <b>Specific mental health conditions</b> |                      |                        |
| *depress*                                | 1053                 |                        |
| affective                                | 141                  |                        |
| mood*                                    | 339                  |                        |
| manic* or mania*                         | 121                  |                        |
| bipolar                                  | 64                   |                        |
| cyclothymi*                              | 1                    |                        |
| dysthymi*                                | 4                    |                        |
| schizo*                                  | 102                  |                        |
| delusion*                                | 7                    |                        |
| paranoi*                                 | 16                   |                        |
| autis*                                   | 179                  |                        |
| asperger*                                | 10                   |                        |
| “eating disorder”                        | 122                  |                        |
| “eating disorders”                       | 105                  |                        |
| anorexi*                                 | 43                   |                        |
| bulimi*                                  | 38                   |                        |



|                               |     |  |
|-------------------------------|-----|--|
| hyperkin*                     | 3   |  |
| hyperactivity                 | 140 |  |
| ADHD                          | 128 |  |
| attention-deficit             | 57  |  |
| “attention deficit”           | 167 |  |
| self-harm*                    | 36  |  |
| “self harm”                   | 11  |  |
| “self harms”                  | 0   |  |
| “self harming”                | 0   |  |
| “self harmed”                 | 0   |  |
| “self harmer”                 | 0   |  |
| suicid*                       | 195 |  |
| overdos*                      | 30  |  |
| PTSD (n.b. Match Case ticked) | 50  |  |
| post-traumatic                | 56  |  |
| posttraumatic                 | 77  |  |
| “post traumatic”              | 3   |  |
| anx*                          | 899 |  |
| OCD (n.b. Match Case ticked)  | 33  |  |
| obsessi*                      | 61  |  |
| compulsi*                     | 96  |  |
| phobi*                        | 134 |  |
| panic*                        | 357 |  |
| “personality disorder”        | 44  |  |

|                         |     |  |
|-------------------------|-----|--|
| “personality disorders” | 15  |  |
| “behavioural disorder”  | 0   |  |
| “behavioural disorders” | 0   |  |
| “behavioral disorder”   | 12  |  |
| “behavioral disorders”  | 10  |  |
| “behaviour disorder”    | 4   |  |
| “behaviour disorders”   | 0   |  |
| “behavior disorder”     | 149 |  |
| “behavior disorders”    | 128 |  |
| “conduct disorder”      | 18  |  |
| “conduct disorders”     | 1   |  |
| “body dysmorphia”       | 0   |  |
| “body dysmorphic”       | 3   |  |

Totals:

n.b. Many records will include more than one of the above terms. Therefore, the totals below are not the sum of the numbers above.

1. Specific condition keywords in Any Fields: 2835
2. General mental health keywords in Title: 1292
3. 1 OR 2 = 3503 (final total for screening)
